# Supplementary material for: A New Porphyrin for the Preparation of Functionalized Water-Soluble Gold Nanoparticles with Low Intrinsic Toxicity
Source: PubMed Central journal article supplement — ChemistryOpen. 2014 Dec 1;4(2):127–36. doi: 10.1002/open.201402092 (PMC4420584; doi:10.1002/open.201402092), 2014-12-01
Supplement: open0004-0127-sd1.pdf [file open0004-0127-sd1.pdf]

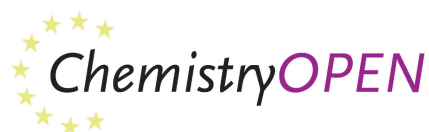

## Supporting Information

© 2015 The Authors. Published by Wiley-VCH Verlag GmbH & Co. KGaA, Weinheim

### **A New Porphyrin for the Preparation of Functionalized Water-Soluble Gold Nanoparticles with Low Intrinsic Toxicity**

Oriol Penon,<sup>[a]</sup> Tania Patiño,<sup>[b]</sup> Lleonard Barrios,<sup>[b]</sup> Carme Nogués,<sup>[b]</sup> David B. Amabilino,<sup>[c]</sup> Klaus Wurst,<sup>[d]</sup> and Lluïsa Pérez-García\*<sup>[a]</sup>

open\_201402092\_sm\_miscellaneous\_information.pdf

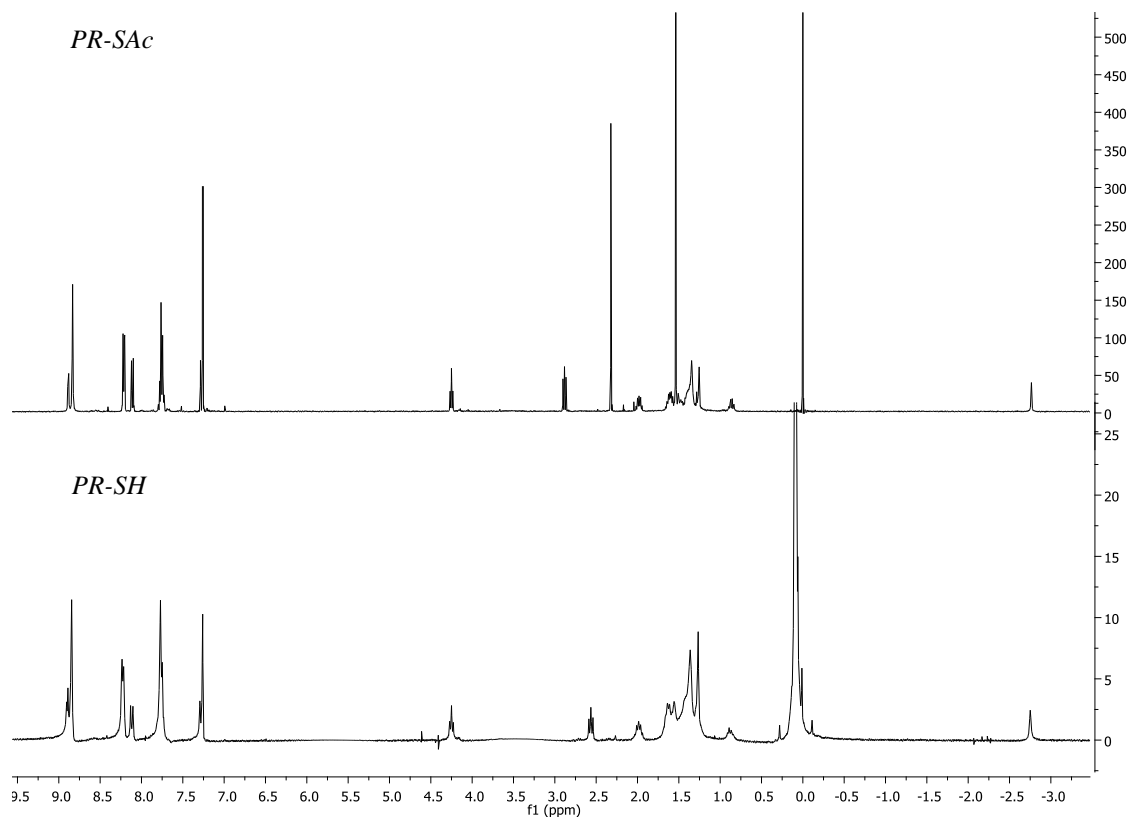

**Figure S1.** <sup>1</sup>H-NMR spectra of **PR-SAc** and **PR-SH** recorded in CDCl<sub>3</sub>.

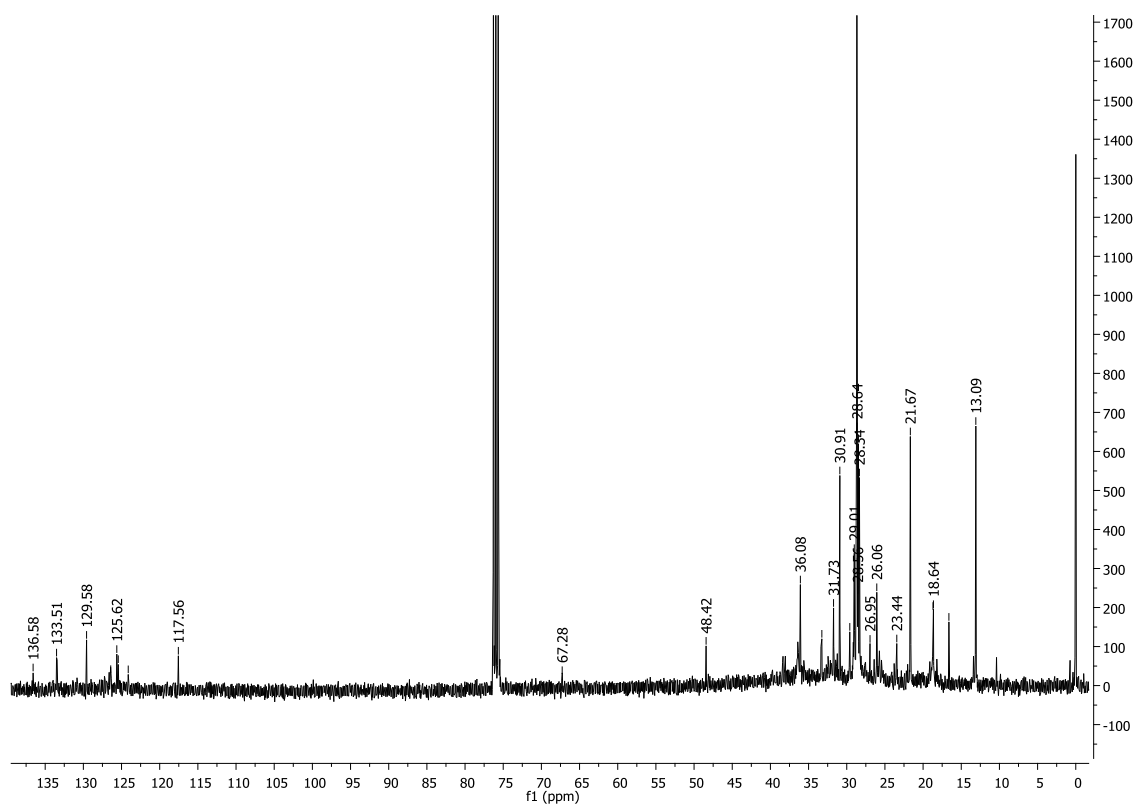

**Figure S2.**  $^{13}\text{C}$ -NMR spectrum of **PR-SH** recorded in  $\text{CDCl}_3$ .

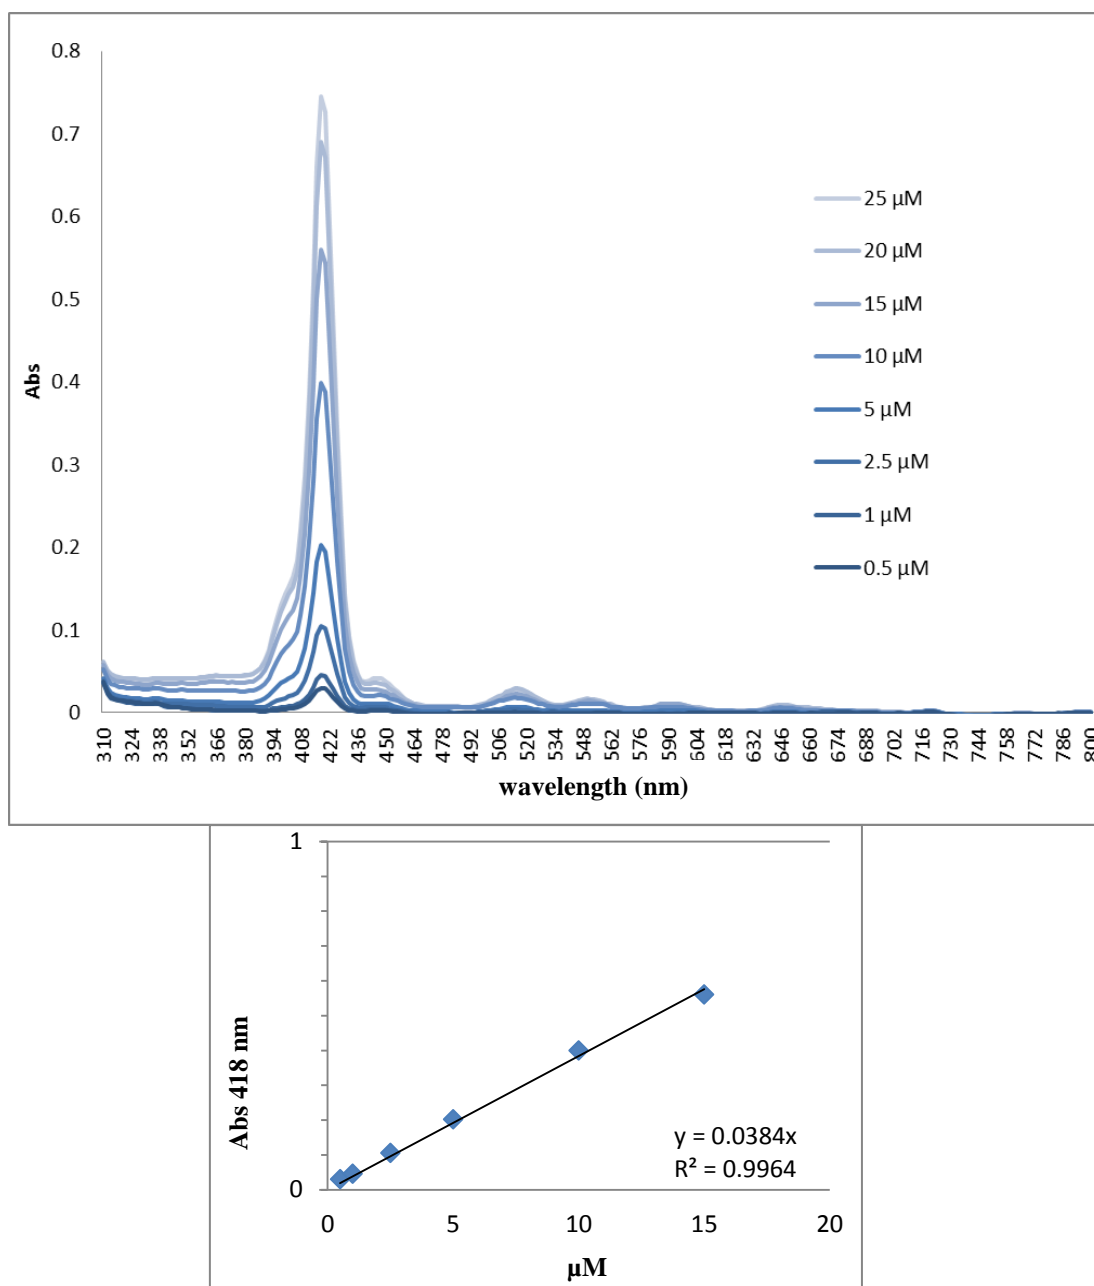

**Figure S3.** PR-SH UV-Vis absorption spectra at different concentrations (0.5-25  $\mu\text{M}$ ) in DCM and their corresponding calibration curve.

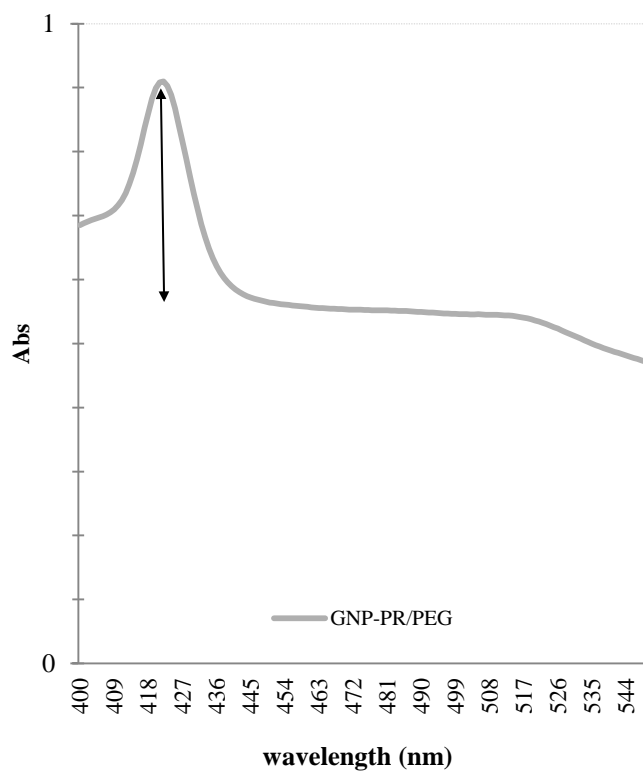

**PR-SH concentration into PR/PEG-GNP:**

Subtracting the Abs at 418 nm (0.861) – Abs at 460 nm (0.580) = 0.280 nm

If we applied the Lambert Beer law:

$$\text{Abs} = \epsilon \cdot \text{cm} \cdot C \quad (\epsilon_{418\text{nm}} = 0.03894 \text{ mM} \cdot \text{cm}^{-1})$$

We obtain  $C = 7.3 \mu\text{M}$

**Figure S4.** UV-Vis absorption spectrum of functionalized **GNP-PR/PEG** and calculation of concentration of the functionalized porphyrin **PR-SH**.

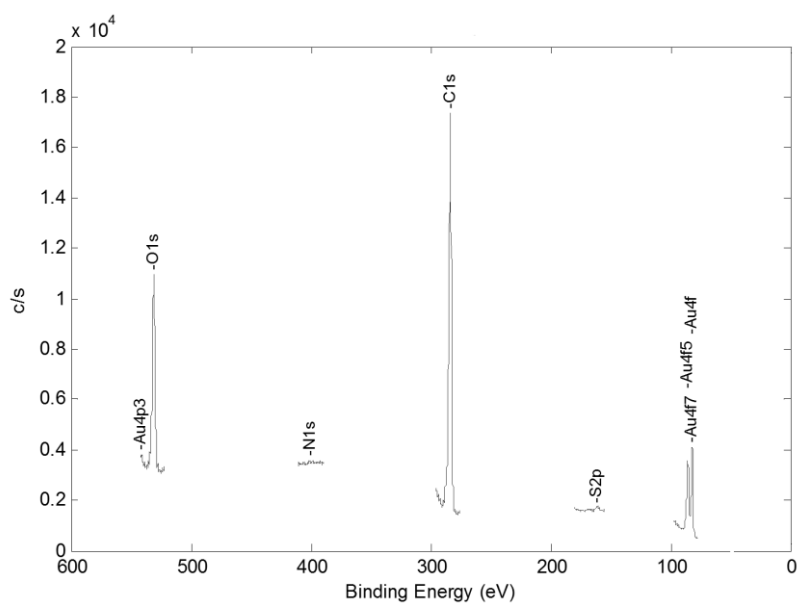

**Figure S5.** XPS spectrum of GNPs-PR/PEG after sputtering.

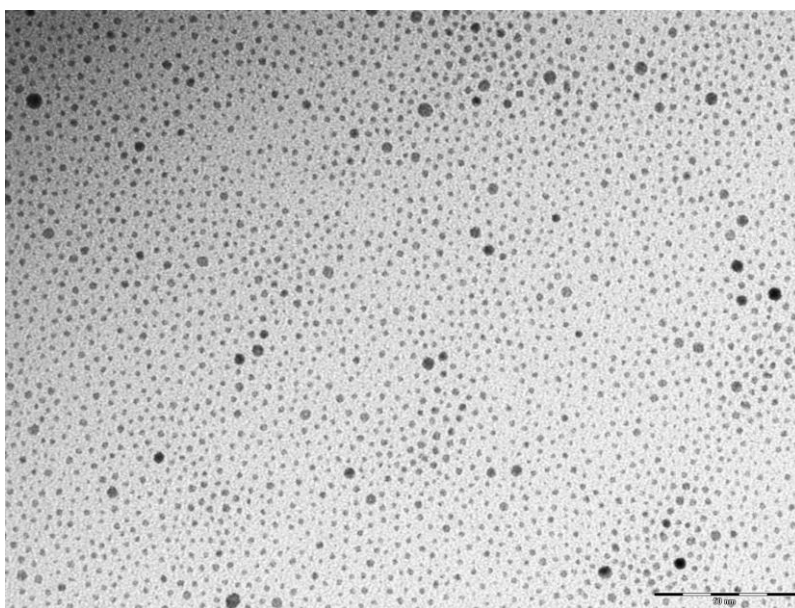

**Figure S6.** TEM image of PEG-GNP.

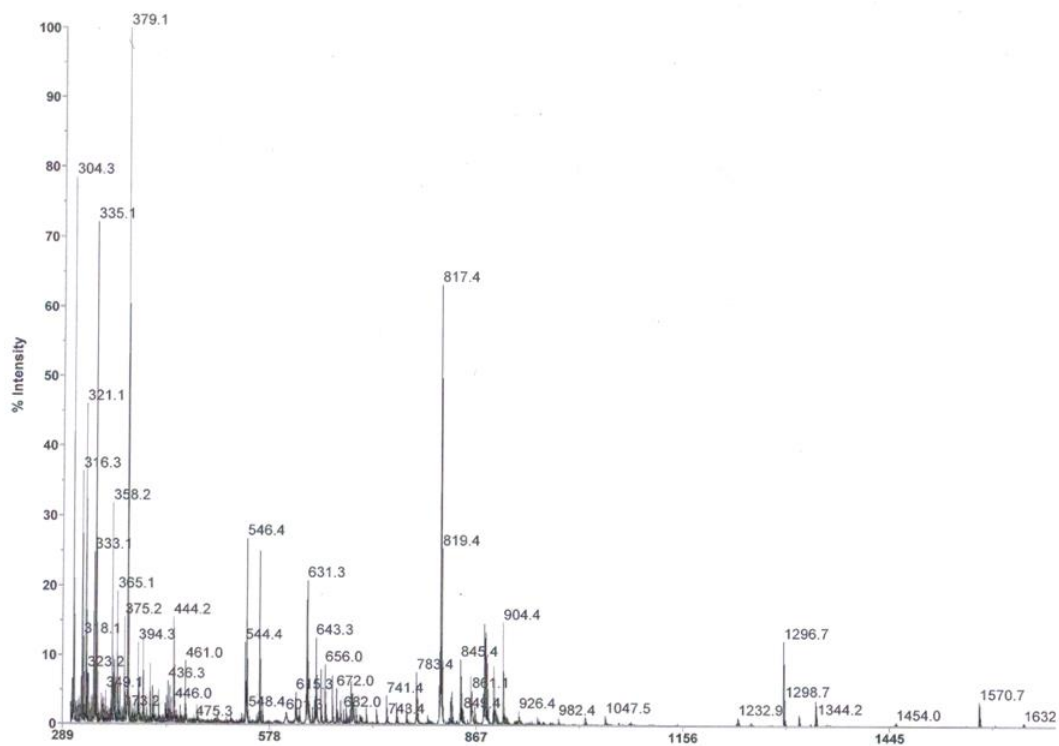

**Figure S7.** MALDI MS spectrum of **PR-SH**.

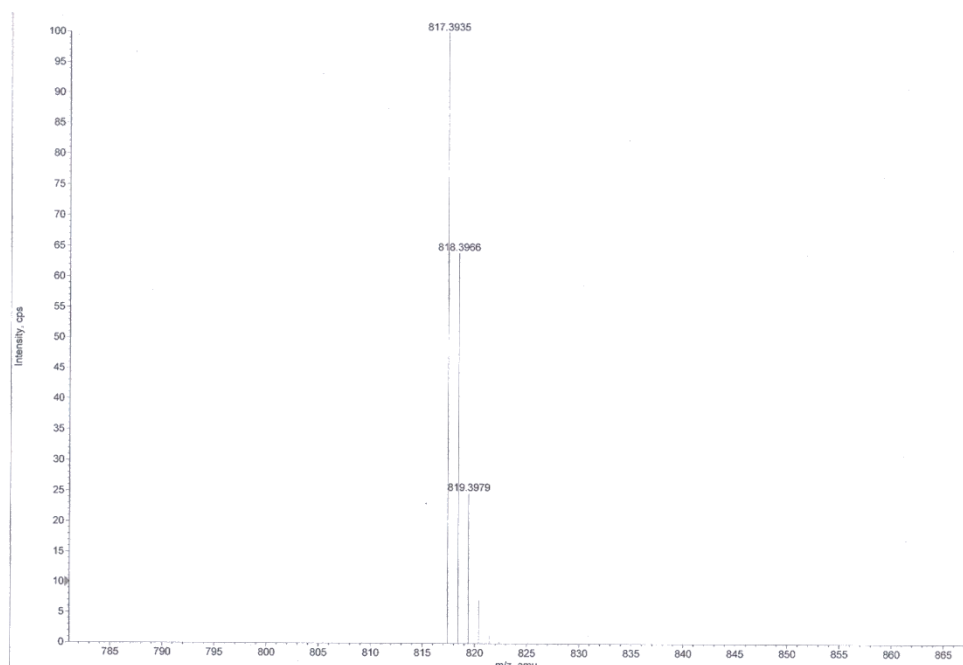

**Figure S8.** HR ESI-MS spectrum of **PR-SH**.

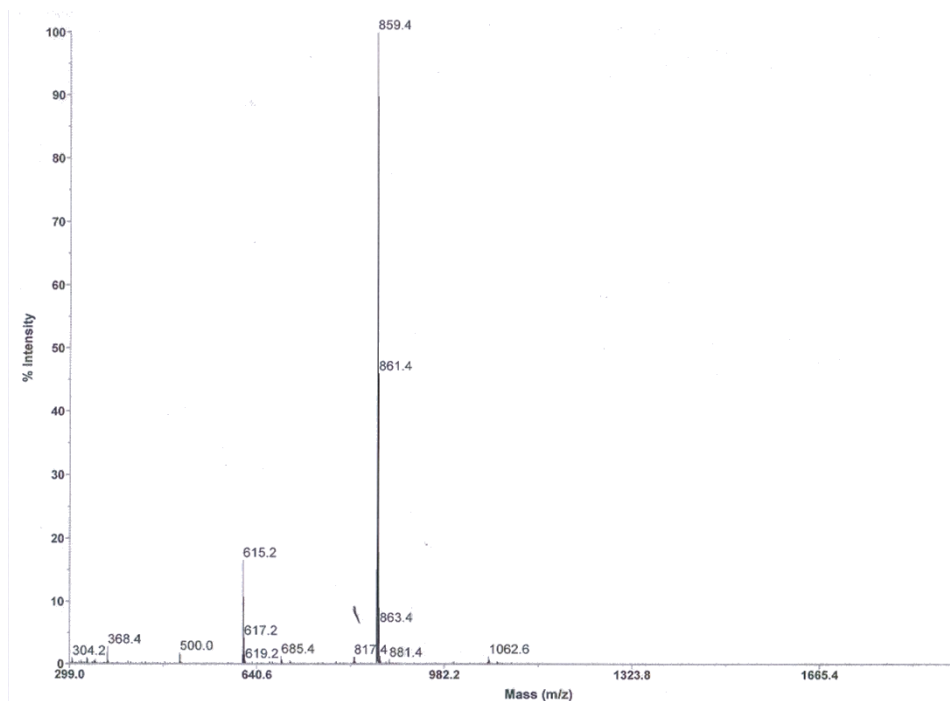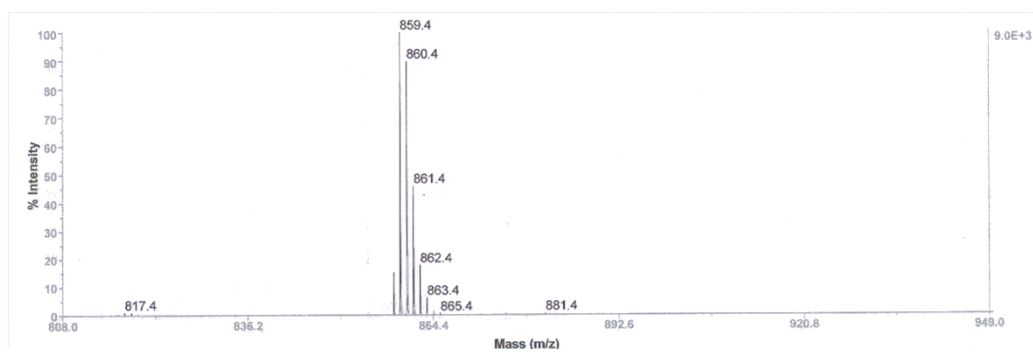

**Figure S9.** MALDI MS spectrum of **PR-Sac**.



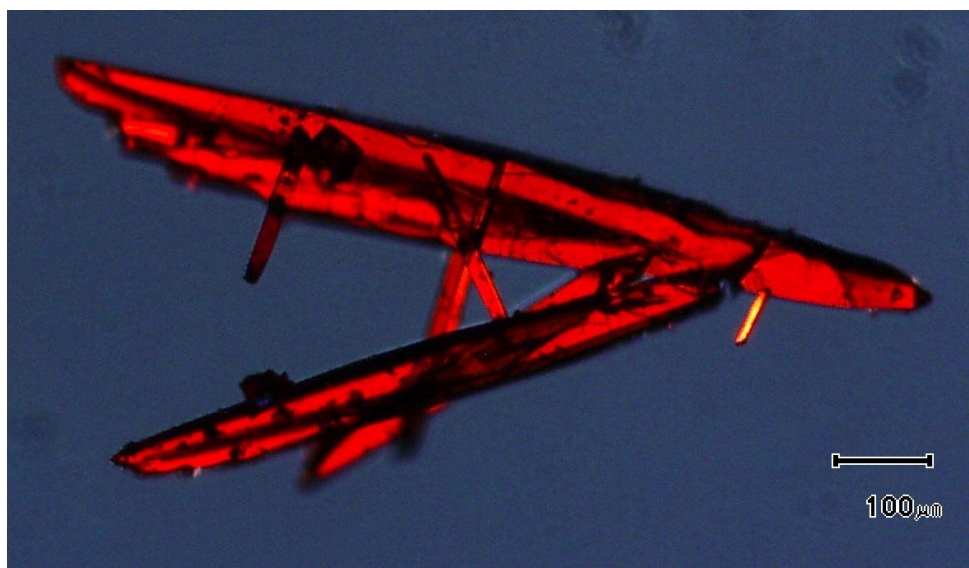

**Figure S10.** Polarised optical micrograph of crystals of **PR-OH**.

### Crystallographic Data:

The porphyrin crystallizes in the space group P-1 with just one independent molecule in the unit cell, but where the hydroxyl group is disordered equally over the four positions where it could theoretically be located. The phenyl rings are rotated at approximately  $60^\circ$  (two in one helical direction and two in the other) to the tetrapyrrolic macrocycle (Figure S11).

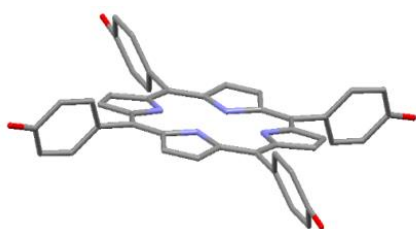

**Figure S11.** A view of the molecule **PR-OH** in its crystals, with the oxygen atom disordered over the four 4-positions of the phenyl rings. Hydrogen atoms are omitted for clarity.

In Figure S12 a view of the packing of the molecule is shown where local hydrogen bonds are indicated, although obviously any molecule may only possess one hydroxyl group, meaning that the intermolecular interactions of this type are present in the minority of cases. In the others, the 4-positions are either both occupied by hydrogen atoms (the majority case) or could contain a hydroxyl group next to a hydrogen atom. The hydrogen atoms at the centre of the porphyrin are also disordered in the structure. The hydroxyl oxygen atom, apart from forming a hydrogen bond with a neighbouring hydroxyl group, also forms weak hydrogen bonds with the CH groups of a pyrrole ring of an adjacent molecule (shortest C-H $\cdots$ O distance 2.99 Å, angle 117.6°, H $\cdots$ O distance 2.44 Å, not shown).

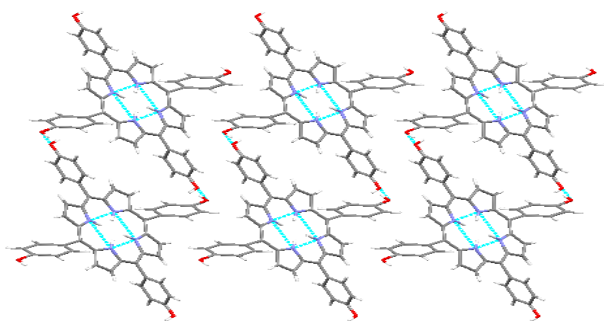

**Figure S12.** A view along the  $a$  axis of the crystal of **PR-OH** with the disordered hydrogen and oxygen atoms shown in all of their possible positions. The hydrogen bonds between neighbouring hydroxyl groups are shown in light blue, as are the close contacts between the pyrrolic nitrogen atoms at the core of the porphyrin.

The porphyrin molecules pack into sheets (Figure S13), where the hydrogen bonds between hydroxyl groups are in the plane, and weak interactions between the hydrogen atoms at the 2 and 3 positions of two of the phenyl rings with the  $\pi$ -bonds of the pyrrole rings in neighbouring macrocycles (approximate  $\text{H}\cdots\text{C}$  distance 2.8 Å). There are no close contacts between the pyrrole rings, as is habitual in tetraphenyl porphyrins where the high angle formed between the aromatic segments does not allow a close approach of this type for steric reasons.

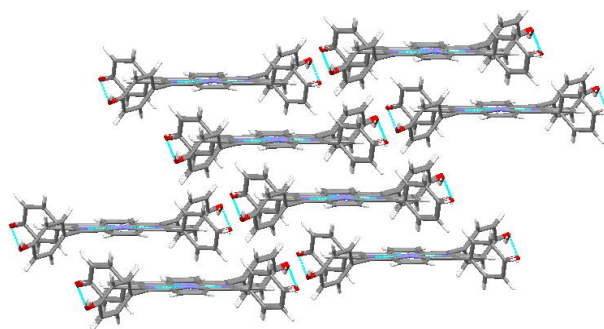

**Figure S13.** A view showing the sheets of porphyrin molecules in the crystal of **PR-OH** along the directions of the hydrogen bonds between molecules.

**Table S1.** Crystal data and structure refinement for **PR-OH** (CCDC 986636).

|                                   |                                                  |                  |
|-----------------------------------|--------------------------------------------------|------------------|
| Empirical formula                 | C <sub>44</sub> H <sub>30</sub> N <sub>4</sub> O |                  |
| Formula weight                    | 630.72                                           |                  |
| Temperature                       | 233(2) K                                         |                  |
| Wavelength                        | 0.71073 Å                                        |                  |
| Crystal system                    | Triclinic                                        |                  |
| Space group                       | P-1 (no. 2)                                      |                  |
| Unit cell dimensions              | a = 6.4427(3) Å                                  | α = 94.097(2)°.  |
|                                   | b = 10.3988(5) Å                                 | β = 100.061(3)°. |
|                                   | c = 12.5525(6) Å                                 | γ = 100.294(3)°. |
| Volume                            | 810.12(7) Å <sup>3</sup>                         |                  |
| Z                                 | 1                                                |                  |
| Density (calculated)              | 1.293 Mg/m <sup>3</sup>                          |                  |
| Absorption coefficient            | 0.078 mm <sup>-1</sup>                           |                  |
| F(000)                            | 330                                              |                  |
| Crystal size                      | 0.33 x 0.11 x 0.04 mm <sup>3</sup>               |                  |
| Theta range for data collection   | 1.66 to 25.00°.                                  |                  |
| Index ranges                      | -7 ≤ h ≤ 7, -12 ≤ k ≤ 12, -14 ≤ l ≤ 14           |                  |
| Reflections collected             | 5164                                             |                  |
| Independent reflections           | 2843 [R(int) = 0.0238]                           |                  |
| Reflections [I > 2σ(I)]           | 2160                                             |                  |
| Completeness to theta = 25.00°    | 99.5 %                                           |                  |
| Absorption correction             | None                                             |                  |
| Refinement method                 | Full-matrix least-squares on F <sup>2</sup>      |                  |
| Data / restraints / parameters    | 2843 / 0 / 246                                   |                  |
| Goodness-of-fit on F <sup>2</sup> | 1.032                                            |                  |
| Final R indices [I > 2σ(I)]       | R1 = 0.0446, wR2 = 0.1040                        |                  |
| R indices (all data)              | R1 = 0.0638, wR2 = 0.1119                        |                  |
| Extinction coefficient            | 0.061(8)                                         |                  |
| Largest diff. peak and hole       | 0.127 and -0.130 e.Å <sup>-3</sup>               |                  |

**Table S2.** Atomic coordinates ( $\times 10^4$ ) and equivalent isotropic displacement parameters ( $\text{\AA}^2 \times 10^3$ ) for **PR-OH**.  $U(\text{eq})$  is defined as one third of the trace of the orthogonalized  $U^{ij}$  tensor.

|        | x        | y       | z        | U(eq) |
|--------|----------|---------|----------|-------|
| O(1)   | 11001(9) | 4883(6) | 2675(5)  | 80(2) |
| O(2)   | 4160(10) | 4247(6) | 11720(4) | 86(2) |
| C(14A) | 9596(3)  | 4134(2) | 3097(2)  | 59(1) |
| C(20A) | 3947(5)  | 3617(2) | 10790(2) | 92(1) |
| C(14)  | 9596(3)  | 4134(2) | 3097(2)  | 59(1) |
| C(20)  | 3947(5)  | 3617(2) | 10790(2) | 92(1) |
| N(1)   | 1297(2)  | -92(1)  | 3577(1)  | 45(1) |
| N(2)   | 2622(2)  | 1354(1) | 5746(1)  | 45(1) |
| C(1)   | 211(3)   | -770(2) | 2600(1)  | 47(1) |
| C(2)   | 1410(3)  | -346(2) | 1792(1)  | 54(1) |
| C(3)   | 3151(3)  | 568(2)  | 2284(2)  | 53(1) |
| C(4)   | 3094(2)  | 743(2)  | 3414(1)  | 45(1) |
| C(5)   | 4515(2)  | 1664(2) | 4202(1)  | 44(1) |
| C(6)   | 4307(2)  | 1899(2) | 5288(1)  | 45(1) |
| C(7)   | 5900(3)  | 2777(2) | 6100(2)  | 53(1) |
| C(8)   | 5152(3)  | 2780(2) | 7029(1)  | 54(1) |
| C(9)   | 3092(2)  | 1892(2) | 6814(1)  | 45(1) |
| C(10)  | 1780(3)  | 1636(2) | 7584(1)  | 46(1) |
| C(11)  | 6316(2)  | 2523(2) | 3829(1)  | 45(1) |
| C(12)  | 7834(3)  | 2001(2) | 3378(2)  | 55(1) |
| C(13)  | 9454(3)  | 2798(2) | 3009(2)  | 60(1) |
| C(15)  | 8126(3)  | 4679(2) | 3555(2)  | 60(1) |
| C(16)  | 6484(3)  | 3881(2) | 3909(2)  | 53(1) |

|       |         |         |          |       |
|-------|---------|---------|----------|-------|
| C(17) | 2556(3) | 2320(2) | 8712(1)  | 52(1) |
| C(18) | 4432(3) | 2133(2) | 9354(2)  | 66(1) |
| C(19) | 5141(4) | 2801(3) | 10393(2) | 82(1) |
| C(21) | 2088(5) | 3800(2) | 10174(2) | 93(1) |
| C(22) | 1411(4) | 3170(2) | 9143(2)  | 72(1) |

---

---

**Table S3.** Bond lengths [ $\text{\AA}$ ] and angles [ $^\circ$ ] for PR-OH.

---

|              |          |
|--------------|----------|
| O(1)-C(14A)  | 1.296(5) |
| O(1)-H(1O)   | 0.8300   |
| O(2)-C(20A)  | 1.271(5) |
| O(2)-H(2O)   | 0.8300   |
| C(14A)-C(13) | 1.371(3) |
| C(14A)-C(15) | 1.373(3) |
| C(20A)-C(21) | 1.359(4) |
| C(20A)-C(19) | 1.366(4) |
| N(1)-C(4)    | 1.373(2) |
| N(1)-C(1)    | 1.374(2) |
| N(1)-H(1N)   | 0.90(2)  |
| N(2)-C(6)    | 1.369(2) |
| N(2)-C(9)    | 1.375(2) |
| N(2)-H(2N)   | 0.97(7)  |
| C(1)-C(10)#1 | 1.402(2) |
| C(1)-C(2)    | 1.426(2) |
| C(2)-C(3)    | 1.355(2) |
| C(2)-H(2)    | 0.9400   |
| C(3)-C(4)    | 1.426(2) |
| C(3)-H(3)    | 0.9400   |
| C(4)-C(5)    | 1.403(2) |
| C(5)-C(6)    | 1.402(2) |
| C(5)-C(11)   | 1.497(2) |
| C(6)-C(7)    | 1.446(2) |
| C(7)-C(8)    | 1.338(2) |
| C(7)-H(7)    | 0.9400   |
| C(8)-C(9)    | 1.445(2) |

|                    |            |
|--------------------|------------|
| C(8)-H(8)          | 0.9400     |
| C(9)-C(10)         | 1.401(2)   |
| C(10)-C(1)#1       | 1.402(2)   |
| C(10)-C(17)        | 1.497(2)   |
| C(11)-C(12)        | 1.383(2)   |
| C(11)-C(16)        | 1.392(2)   |
| C(12)-C(13)        | 1.380(2)   |
| C(12)-H(12)        | 0.9400     |
| C(13)-H(13)        | 0.9400     |
| C(15)-C(16)        | 1.382(2)   |
| C(15)-H(15)        | 0.9400     |
| C(16)-H(16)        | 0.9400     |
| C(17)-C(18)        | 1.384(3)   |
| C(17)-C(22)        | 1.386(3)   |
| C(18)-C(19)        | 1.393(3)   |
| C(18)-H(18)        | 0.9400     |
| C(19)-H(19)        | 0.9400     |
| C(21)-C(22)        | 1.369(3)   |
| C(21)-H(21)        | 0.9400     |
| C(22)-H(22)        | 0.9400     |
| O(1)-C(14A)-C(13)  | 120.7(3)   |
| O(1)-C(14A)-C(15)  | 119.2(3)   |
| C(13)-C(14A)-C(15) | 119.87(16) |
| O(2)-C(20A)-C(21)  | 107.6(4)   |
| O(2)-C(20A)-C(19)  | 131.6(4)   |
| C(21)-C(20A)-C(19) | 120.7(2)   |
| C(4)-N(1)-C(1)     | 109.45(14) |
| C(4)-N(1)-H(1N)    | 124.6(14)  |



|                   |            |
|-------------------|------------|
| C(1)-N(1)-H(1N)   | 125.6(14)  |
| C(6)-N(2)-C(9)    | 105.96(14) |
| C(6)-N(2)-H(2N)   | 128(4)     |
| C(9)-N(2)-H(2N)   | 126(4)     |
| N(1)-C(1)-C(10)#1 | 126.53(15) |
| N(1)-C(1)-C(2)    | 107.01(14) |
| C(10)#1-C(1)-C(2) | 126.29(16) |
| C(3)-C(2)-C(1)    | 108.28(15) |
| C(3)-C(2)-H(2)    | 125.9      |
| C(1)-C(2)-H(2)    | 125.9      |
| C(2)-C(3)-C(4)    | 108.03(15) |
| C(2)-C(3)-H(3)    | 126.0      |
| C(4)-C(3)-H(3)    | 126.0      |
| N(1)-C(4)-C(5)    | 126.12(15) |
| N(1)-C(4)-C(3)    | 107.22(14) |
| C(5)-C(4)-C(3)    | 126.51(15) |
| C(6)-C(5)-C(4)    | 125.32(15) |
| C(6)-C(5)-C(11)   | 117.54(14) |
| C(4)-C(5)-C(11)   | 117.02(15) |
| N(2)-C(6)-C(5)    | 126.50(15) |
| N(2)-C(6)-C(7)    | 109.84(15) |
| C(5)-C(6)-C(7)    | 123.66(15) |
| C(8)-C(7)-C(6)    | 107.28(15) |
| C(8)-C(7)-H(7)    | 126.4      |
| C(6)-C(7)-H(7)    | 126.4      |
| C(7)-C(8)-C(9)    | 107.04(15) |
| C(7)-C(8)-H(8)    | 126.5      |
| C(9)-C(8)-H(8)    | 126.5      |
| N(2)-C(9)-C(10)   | 125.65(14) |

|                    |            |
|--------------------|------------|
| N(2)-C(9)-C(8)     | 109.85(15) |
| C(10)-C(9)-C(8)    | 124.49(15) |
| C(9)-C(10)-C(1)#1  | 125.67(15) |
| C(9)-C(10)-C(17)   | 118.18(14) |
| C(1)#1-C(10)-C(17) | 116.14(15) |
| C(12)-C(11)-C(16)  | 117.84(15) |
| C(12)-C(11)-C(5)   | 121.58(14) |
| C(16)-C(11)-C(5)   | 120.57(14) |
| C(13)-C(12)-C(11)  | 121.17(15) |
| C(13)-C(12)-H(12)  | 119.4      |
| C(11)-C(12)-H(12)  | 119.4      |
| C(14A)-C(13)-C(12) | 120.13(16) |
| C(14A)-C(13)-H(13) | 119.9      |
| C(12)-C(13)-H(13)  | 119.9      |
| C(14A)-C(15)-C(16) | 120.04(16) |
| C(14A)-C(15)-H(15) | 120.0      |
| C(16)-C(15)-H(15)  | 120.0      |
| C(15)-C(16)-C(11)  | 120.93(16) |
| C(15)-C(16)-H(16)  | 119.5      |
| C(11)-C(16)-H(16)  | 119.5      |
| C(18)-C(17)-C(22)  | 117.89(17) |
| C(18)-C(17)-C(10)  | 121.44(16) |
| C(22)-C(17)-C(10)  | 120.67(16) |
| C(17)-C(18)-C(19)  | 120.3(2)   |
| C(17)-C(18)-H(18)  | 119.9      |
| C(19)-C(18)-H(18)  | 119.9      |
| C(20A)-C(19)-C(18) | 119.8(2)   |
| C(20A)-C(19)-H(19) | 120.1      |
| C(18)-C(19)-H(19)  | 120.1      |

|                    |          |
|--------------------|----------|
| C(20A)-C(21)-C(22) | 119.8(2) |
| C(20A)-C(21)-H(21) | 120.1    |
| C(22)-C(21)-H(21)  | 120.1    |
| C(21)-C(22)-C(17)  | 121.6(2) |
| C(21)-C(22)-H(22)  | 119.2    |
| C(17)-C(22)-H(22)  | 119.2    |

---

Symmetry transformations used to generate equivalent atoms:

#1 -x,-y,-z+1

**Table S4.** Anisotropic displacement parameters ( $\text{\AA}^2 \times 10^3$ ) for **PR-OH**. The anisotropic displacement factor exponent takes the form:  $-2\pi^2 [h^2 a^{*2} U^{11} + \dots + 2 h k a^* b^* U^{12}]$ .

|        | $U^{11}$ | $U^{22}$ | $U^{33}$ | $U^{23}$ | $U^{13}$ | $U^{12}$ |
|--------|----------|----------|----------|----------|----------|----------|
| O(1)   | 66(4)    | 82(4)    | 80(4)    | 16(3)    | 25(3)    | -29(3)   |
| O(2)   | 99(5)    | 93(4)    | 47(3)    | -28(3)   | 11(3)    | -11(3)   |
| C(14A) | 48(1)    | 59(1)    | 64(1)    | 14(1)    | 11(1)    | -5(1)    |
| C(20A) | 130(2)   | 77(2)    | 57(2)    | -7(1)    | 23(2)    | -13(2)   |
| C(14)  | 48(1)    | 59(1)    | 64(1)    | 14(1)    | 11(1)    | -5(1)    |
| C(20)  | 130(2)   | 77(2)    | 57(2)    | -7(1)    | 23(2)    | -13(2)   |
| N(1)   | 42(1)    | 43(1)    | 49(1)    | 4(1)     | 10(1)    | 4(1)     |
| N(2)   | 41(1)    | 40(1)    | 51(1)    | 6(1)     | 8(1)     | 3(1)     |
| C(1)   | 46(1)    | 44(1)    | 50(1)    | 2(1)     | 9(1)     | 8(1)     |
| C(2)   | 54(1)    | 54(1)    | 52(1)    | 1(1)     | 15(1)    | 4(1)     |
| C(3)   | 50(1)    | 51(1)    | 58(1)    | 4(1)     | 18(1)    | 3(1)     |
| C(4)   | 41(1)    | 40(1)    | 56(1)    | 6(1)     | 13(1)    | 6(1)     |
| C(5)   | 39(1)    | 39(1)    | 55(1)    | 9(1)     | 10(1)    | 7(1)     |
| C(6)   | 38(1)    | 41(1)    | 56(1)    | 10(1)    | 8(1)     | 5(1)     |
| C(7)   | 43(1)    | 52(1)    | 58(1)    | 6(1)     | 7(1)     | -4(1)    |
| C(8)   | 50(1)    | 53(1)    | 53(1)    | 2(1)     | 4(1)     | -4(1)    |
| C(9)   | 43(1)    | 40(1)    | 50(1)    | 5(1)     | 5(1)     | 5(1)     |
| C(10)  | 44(1)    | 42(1)    | 50(1)    | 3(1)     | 6(1)     | 6(1)     |
| C(11)  | 40(1)    | 43(1)    | 52(1)    | 7(1)     | 7(1)     | 5(1)     |
| C(12)  | 46(1)    | 45(1)    | 76(1)    | 11(1)    | 15(1)    | 10(1)    |
| C(13)  | 45(1)    | 63(1)    | 76(1)    | 12(1)    | 18(1)    | 11(1)    |
| C(15)  | 63(1)    | 41(1)    | 71(1)    | 10(1)    | 13(1)    | -1(1)    |
| C(16)  | 53(1)    | 44(1)    | 63(1)    | 5(1)     | 16(1)    | 7(1)     |

|       |        |       |       |        |       |        |
|-------|--------|-------|-------|--------|-------|--------|
| C(17) | 53(1)  | 49(1) | 52(1) | 5(1)   | 12(1) | -1(1)  |
| C(18) | 61(1)  | 76(1) | 56(1) | 6(1)   | 8(1)  | 3(1)   |
| C(19) | 77(1)  | 97(2) | 58(1) | 15(1)  | 0(1)  | -13(1) |
| C(21) | 134(2) | 76(2) | 69(2) | -11(1) | 23(2) | 21(2)  |
| C(22) | 85(1)  | 62(1) | 68(1) | -1(1)  | 17(1) | 14(1)  |

---

**Table S5.** Hydrogen coordinates (  $\times 10^4$ ) and isotropic displacement parameters ( $\text{\AA}^2 \times 10^3$ ) for **PR-OH**.

|       | x         | y        | z        | U(eq)  |
|-------|-----------|----------|----------|--------|
| H(1N) | 840(30)   | -120(20) | 4210(20) | 46(6)  |
| H(2N) | 1340(110) | 730(70)  | 5400(50) | 51(19) |
| H(1O) | 11520     | 4424     | 2264     | 120    |
| H(2O) | 3244      | 3881     | 12048    | 129    |
| H(14) | 10697     | 4676     | 2843     | 71     |
| H(20) | 4415      | 4056     | 11495    | 111    |
| H(2)  | 1054      | -649     | 1047     | 65     |
| H(3)  | 4211      | 1010     | 1939     | 64     |
| H(7)  | 7217      | 3256     | 5994     | 64     |
| H(8)  | 5837      | 3267     | 7697     | 65     |
| H(12) | 7762      | 1087     | 3321     | 66     |
| H(13) | 10463     | 2424     | 2698     | 72     |
| H(15) | 8237      | 5596     | 3628     | 72     |
| H(16) | 5466      | 4260     | 4208     | 64     |
| H(18) | 5232      | 1552     | 9089     | 79     |
| H(19) | 6437      | 2691     | 10820    | 99     |
| H(21) | 1269      | 4357     | 10455    | 112    |
| H(22) | 140       | 3317     | 8717     | 86     |
